# Supplementary material for: Transcutaneous Electrical Acupoint Stimulation Ameliorates Cognitive Function through PINK1/Parkin Mediated Mitophagy in VD Rats
Source: Hindawi journal article supplement (doi:10.1155/2022/2810794), 2022-06-03
Supplement: f1 [file 2810794.f1.zip]

**Figure 1**

| discrimination index (%)                |        |        |        |        |        |        |        |        |        |        |        |      |
|-----------------------------------------|--------|--------|--------|--------|--------|--------|--------|--------|--------|--------|--------|------|
|                                         | Sham   |        |        | Model  |        |        | TEAS   |        |        | T+3-MA |        |      |
| 0                                       | 0.91   | 0.67   | 0.68   | 0.3    | 0.49   | 0.17   | 0.47   | 0.49   | 0.48   | 0.37   | 0.45   | 0.55 |
| 7d                                      | 0.73   | 0.71   | 0.75   | 0.57   | 0.41   | 0.48   | 0.63   | 0.66   | 0.5    | 0.45   | 0.43   | 0.57 |
| 14d                                     | 0.74   | 0.76   | 0.73   | 0.56   | 0.5    | 0.63   | 0.62   | 0.7    | 0.76   | 0.5    | 0.51   | 0.59 |
| alternating percentage (%)              |        |        |        |        |        |        |        |        |        |        |        |      |
|                                         | Sham   |        |        | Model  |        |        | TEAS   |        |        | T+3-MA |        |      |
| 14d                                     | 0.86   | 0.73   | 0.8    | 0.5    | 0.57   | 0.61   | 0.67   | 0.67   | 0.78   | 0.5636 | 0.5    | 0.6  |
|                                         |        |        |        |        |        |        |        |        |        |        |        |      |
| Swimming speed (cm/s)                   |        |        |        |        |        |        |        |        |        |        |        |      |
|                                         | Sham   |        |        | Model  |        |        | TEAS   |        |        | T+3-MA |        |      |
| 14d                                     | 24.762 | 24.705 | 33.696 | 19.496 | 23.762 | 36.162 | 34.975 | 33.539 | 36.967 | 29.313 | 24.486 | 25   |
| Latency to platform (s)                 |        |        |        |        |        |        |        |        |        |        |        |      |
|                                         | Sham   |        |        | Model  |        |        | TEAS   |        |        | T+3-MA |        |      |
| 14d                                     | 15.25  | 32.75  | 27     | 60     | 55     | 60     | 20.52  | 37.25  | 14     | 37     | 60     | 55   |
| Times of crossing the original platform |        |        |        |        |        |        |        |        |        |        |        |      |
|                                         | Sham   |        |        | Model  |        |        | TEAS   |        |        | T+3-MA |        |      |
| 14d                                     | 6      | 7      | 7      | 2      | 4      | 4      | 6      | 6      | 5      | 4      | 3      | 4    |
| Time spent on the original platform (s) |        |        |        |        |        |        |        |        |        |        |        |      |
|                                         | Sham   |        |        | Model  |        |        | TEAS   |        |        | T+3-MA |        |      |
| 14d                                     | 13.6   | 11.8   | 15.6   | 8.8    | 5.4    | 7.6    | 12.2   | 13     | 10.4   | 7.8    | 6.4    | 8.9  |

**Figure 2**

|     | Sham |      |      | Model |      |      | TEAS |      |      | T+3-MA |      |      |
|-----|------|------|------|-------|------|------|------|------|------|--------|------|------|
| LC3 | 0.8  | 0.93 | 0.76 | 0.09  | 0.19 | 0.29 | 0.79 | 0.89 | 0.99 | 0.12   | 0.54 | 0.53 |

**Figure 3**

|        | Sham |      |      | Model |      |      | TEAS |      |      | T+3-MA |      |      |
|--------|------|------|------|-------|------|------|------|------|------|--------|------|------|
| PINK1  | 0.39 | 0.62 | 0.49 | 0.17  | 0.22 | 0.14 | 0.31 | 0.34 | 0.33 | 0.21   | 0.25 | 0.24 |
| Parkin | 0.43 | 0.4  | 0.3  | 0.07  | 0.12 | 0.11 | 0.21 | 0.3  | 0.2  | 0.13   | 0.23 | 0.15 |

|         | Sham |      |      | Model |      |      | TEAS |      |      | T+3-MA |      |      |
|---------|------|------|------|-------|------|------|------|------|------|--------|------|------|
| LC3- I  | 0.12 | 0.1  | 0.09 | 0.5   | 0.46 | 0.44 | 0.2  | 0.17 | 0.1  | 0.36   | 0.32 | 0.13 |
| LC3- II | 0.56 | 0.54 | 0.35 | 0.1   | 0.16 | 0.09 | 0.46 | 0.41 | 0.18 | 0.24   | 0.23 | 0.12 |
| p62     | 0.27 | 0.28 | 0.21 | 0.58  | 0.55 | 0.49 | 0.31 | 0.28 | 0.24 | 0.38   | 0.41 | 0.41 |
