# Supplementary figures and images for: Transcutaneous Electrical Acupoint Stimulation Ameliorates Cognitive Function through PINK1/Parkin Mediated Mitophagy in VD Rats
Source: Hindawi journal article supplement (doi:10.1155/2022/2810794), 2022-06-03

Figure 1

A

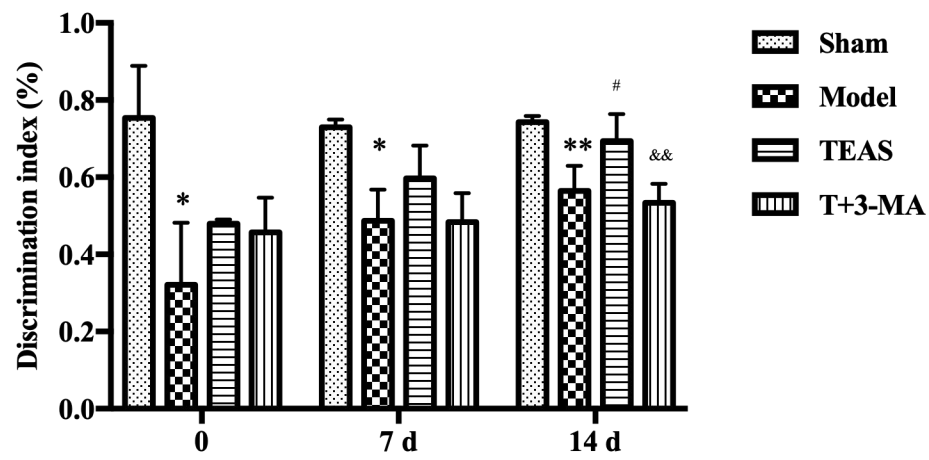

B

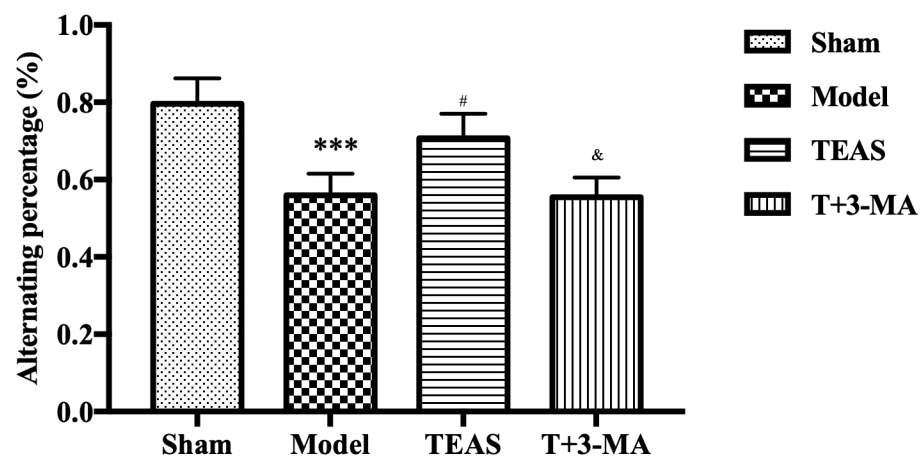

C

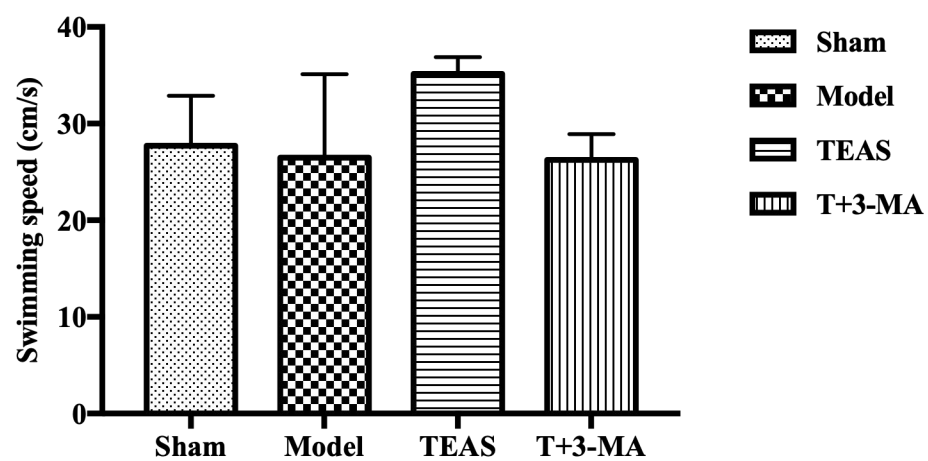

D

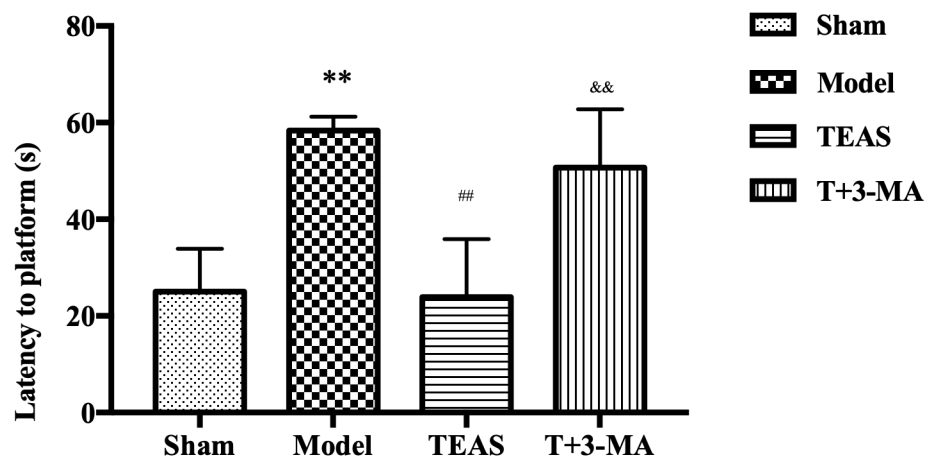

E

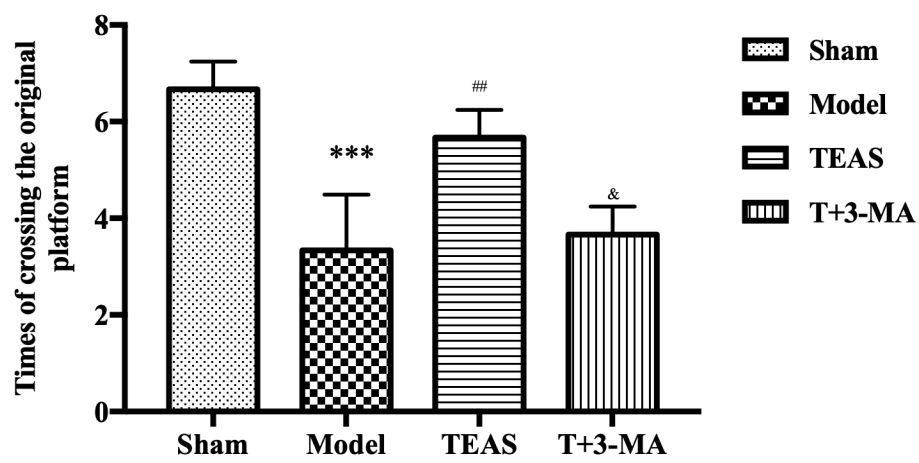

F

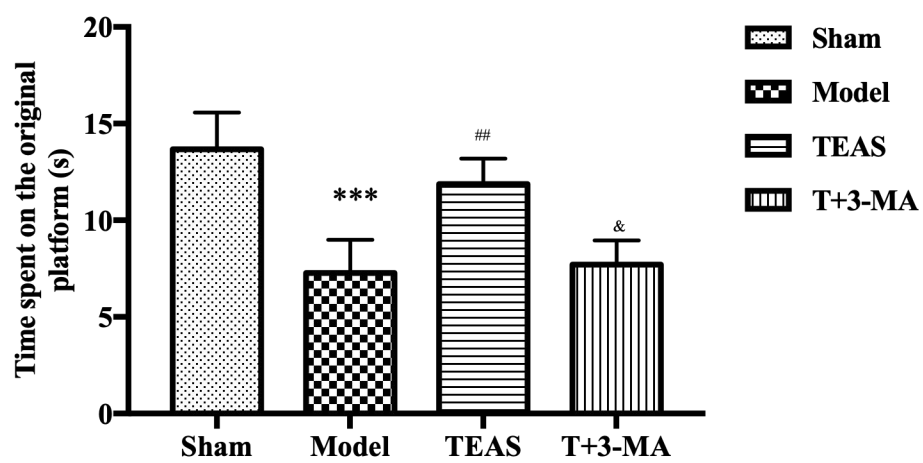

**Figure 2**  
**Sham**

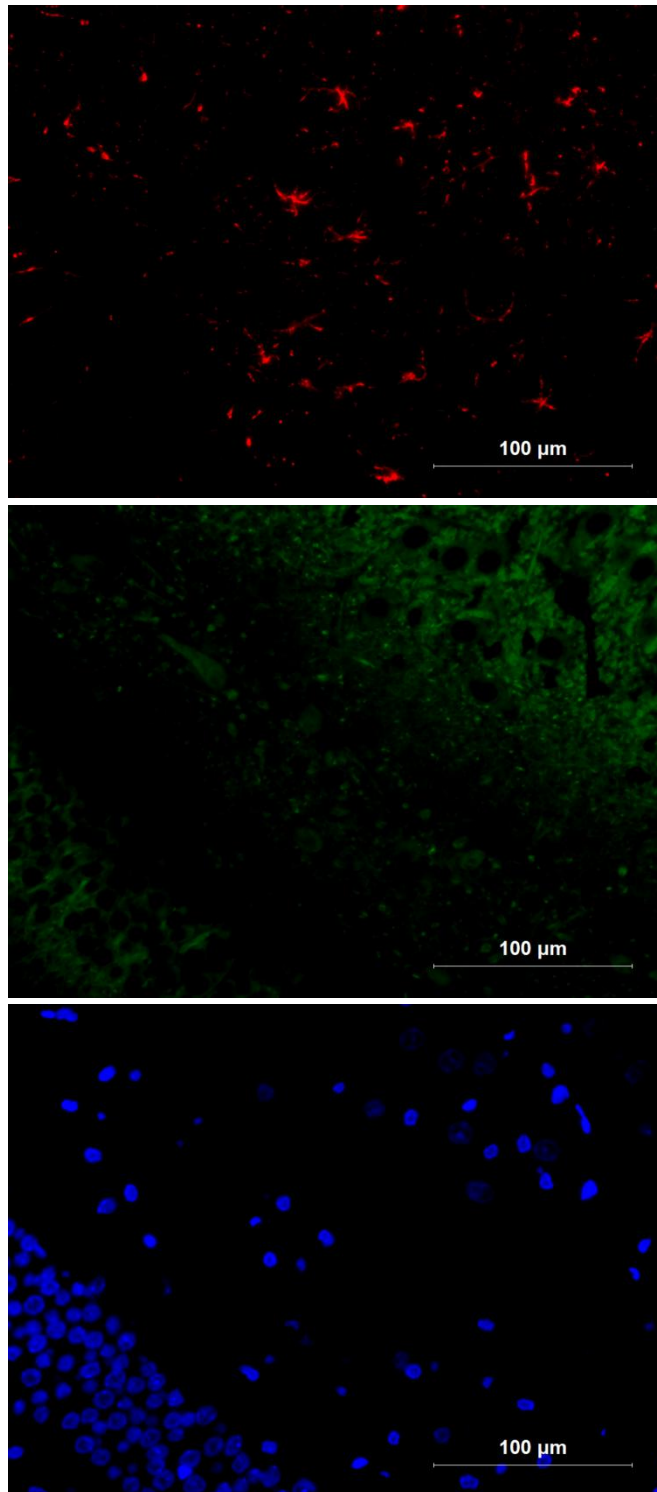

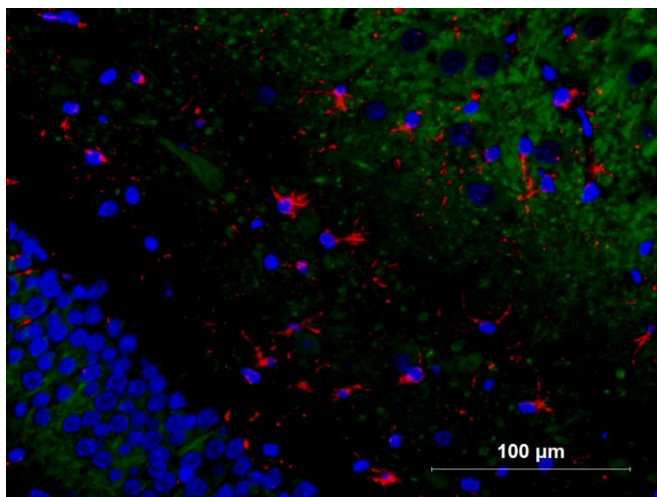

**Model**

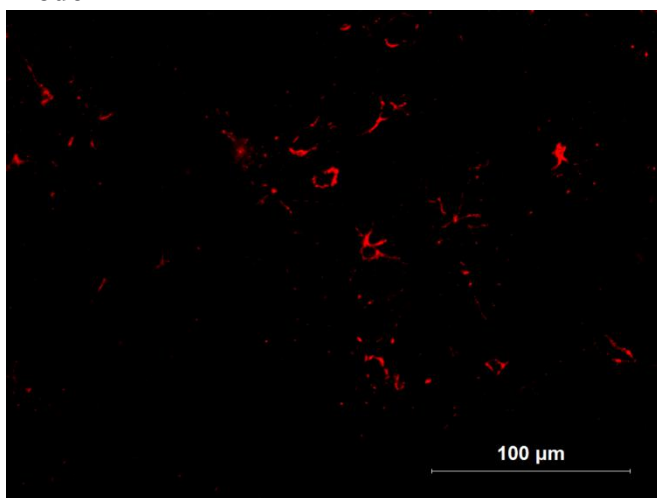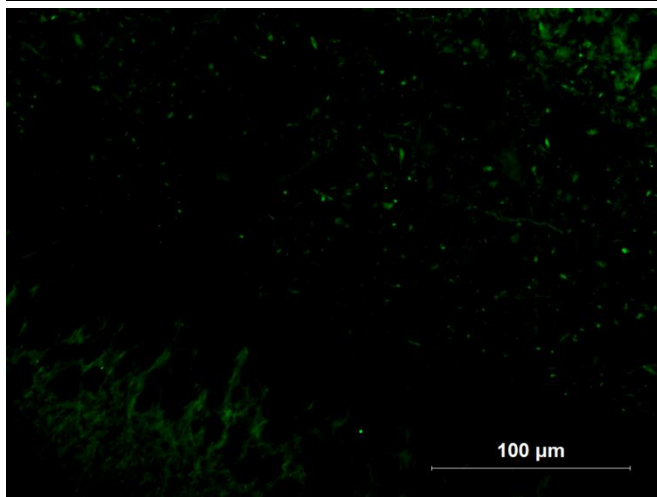

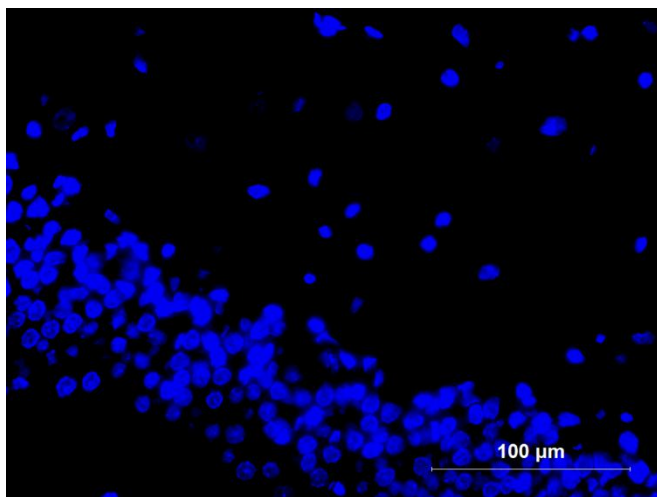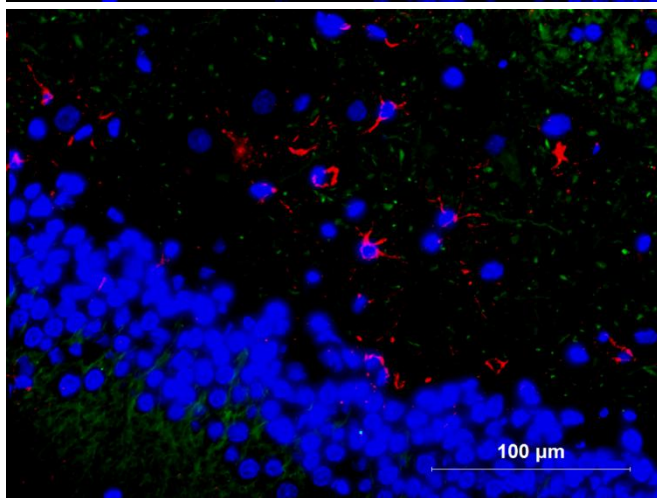

**TEAS**

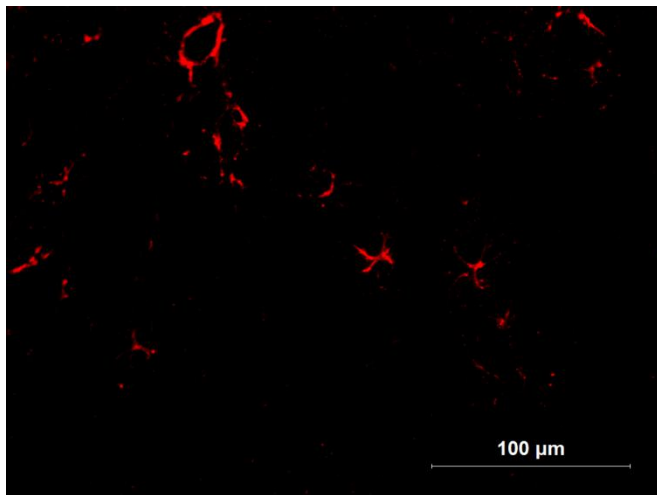

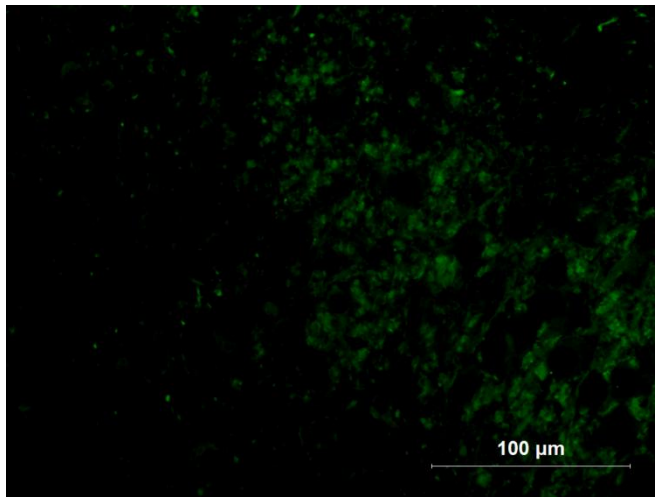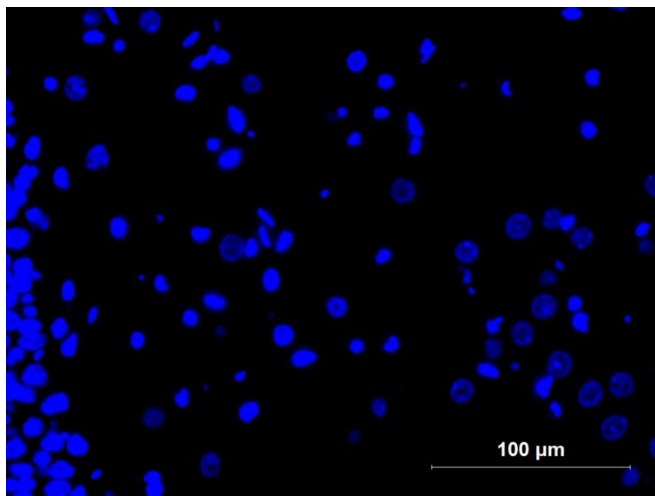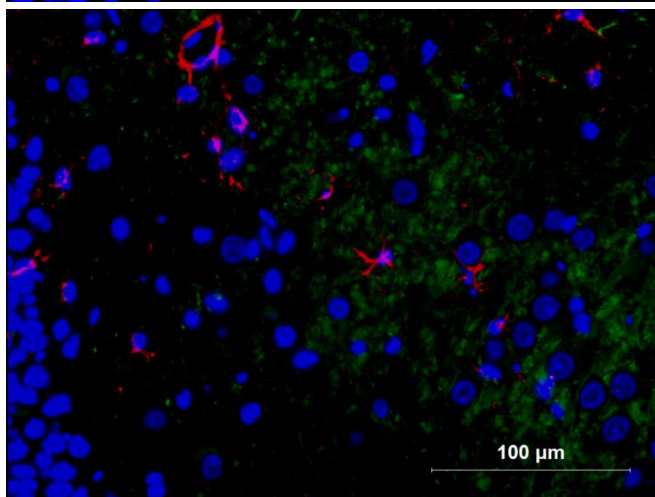

**TEAS+3-MA**

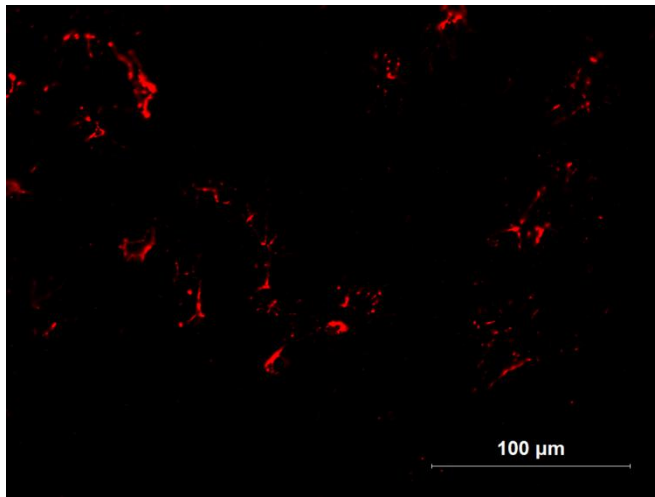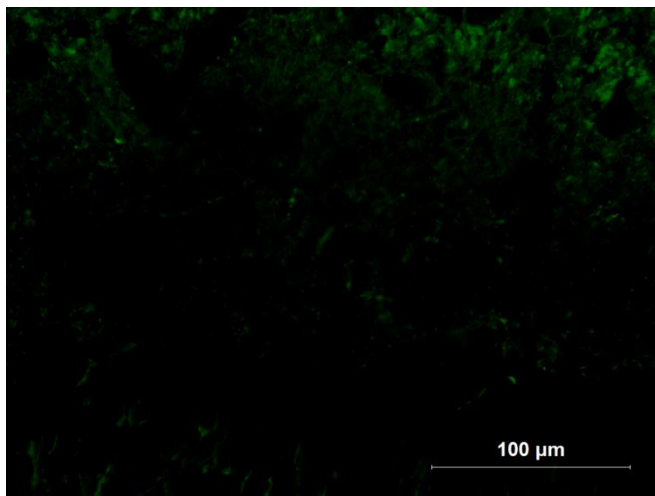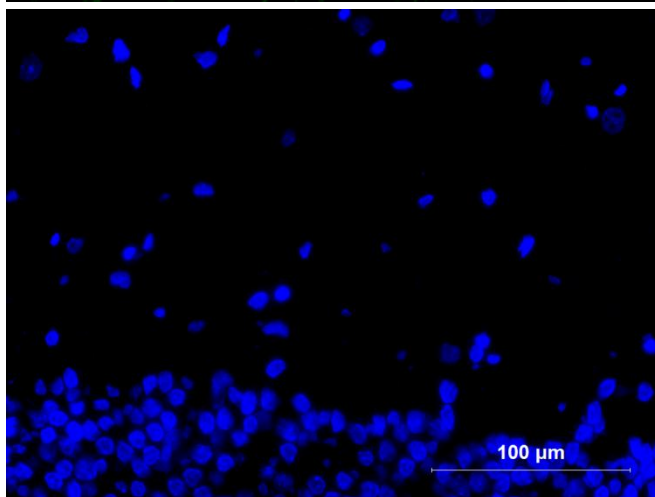

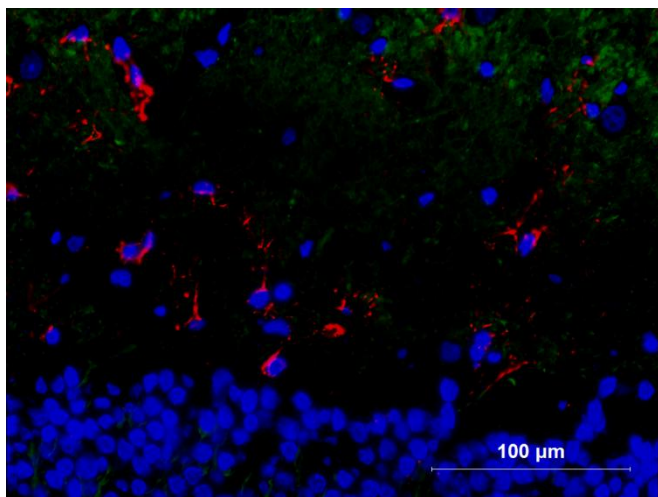



Figure 3

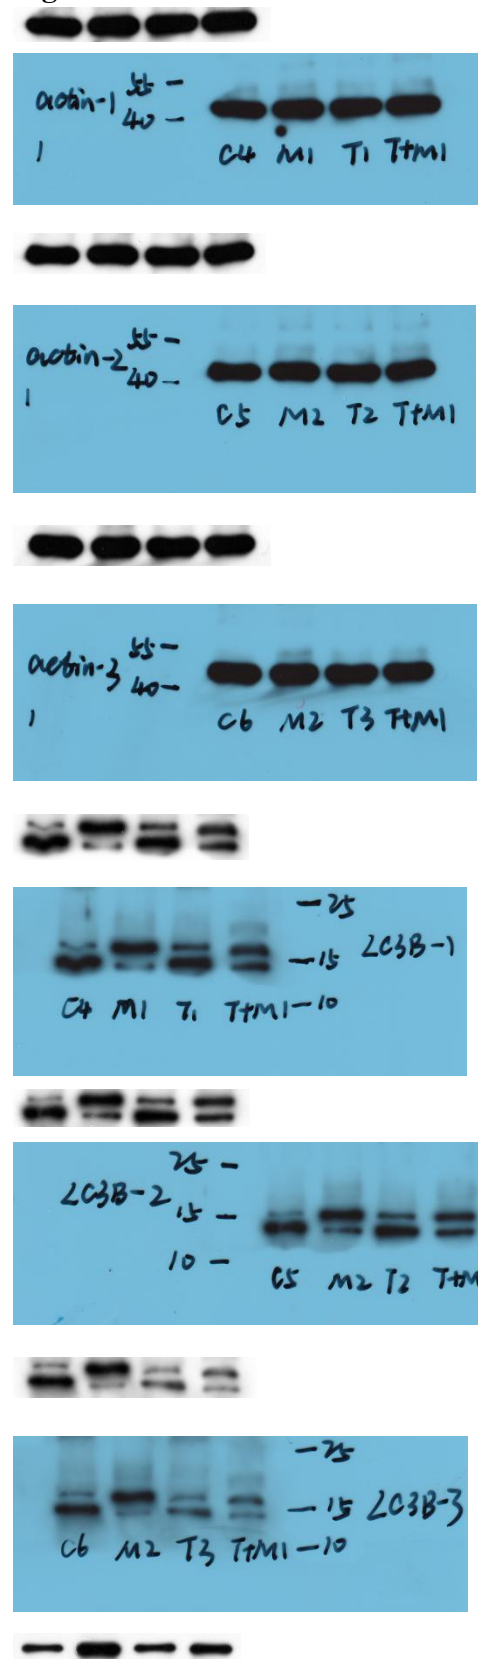

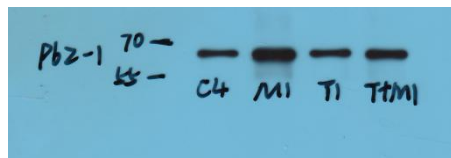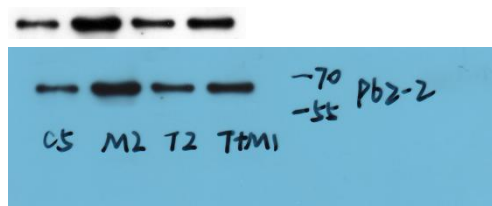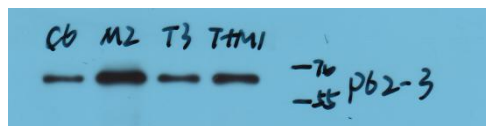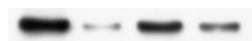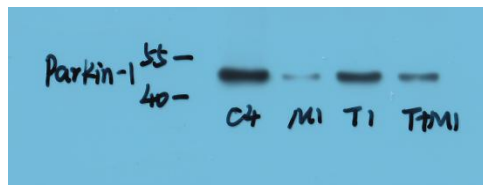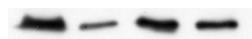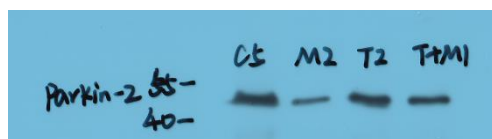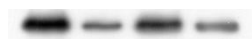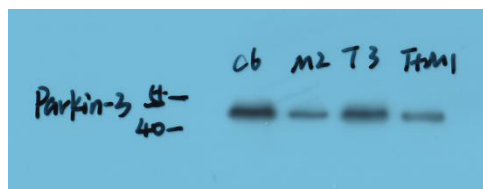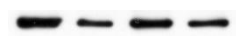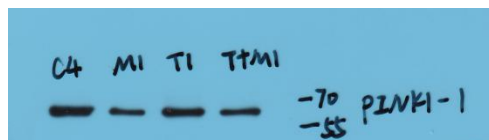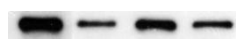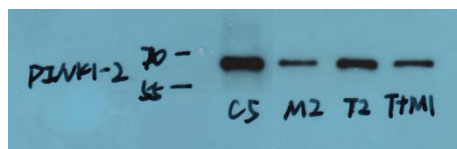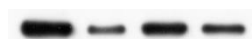

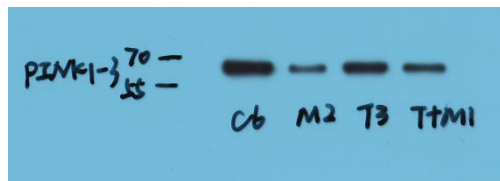

Supplement: f1 [file 2810794.f1.zip]
